# Supplementary material for: A well-defined magnesium enolate initiator for the living and highly syndioselective polymerisation of methylmethacrylateElectronic supplementary information (ESI) available: synthetic and polymerisation details. See http://www.rsc.org/suppdata/cc/b2/b201896a/
Source: Royal Society of Chemistry journal article supplement (doi:10.1039/b201896a), 2002-05-07
Supplement: b201896a.doc [file b201896a.doc]

Supplementary Material (ESI) for Chemical Communications

This journal is © The Royal Society of Chemistry 2002


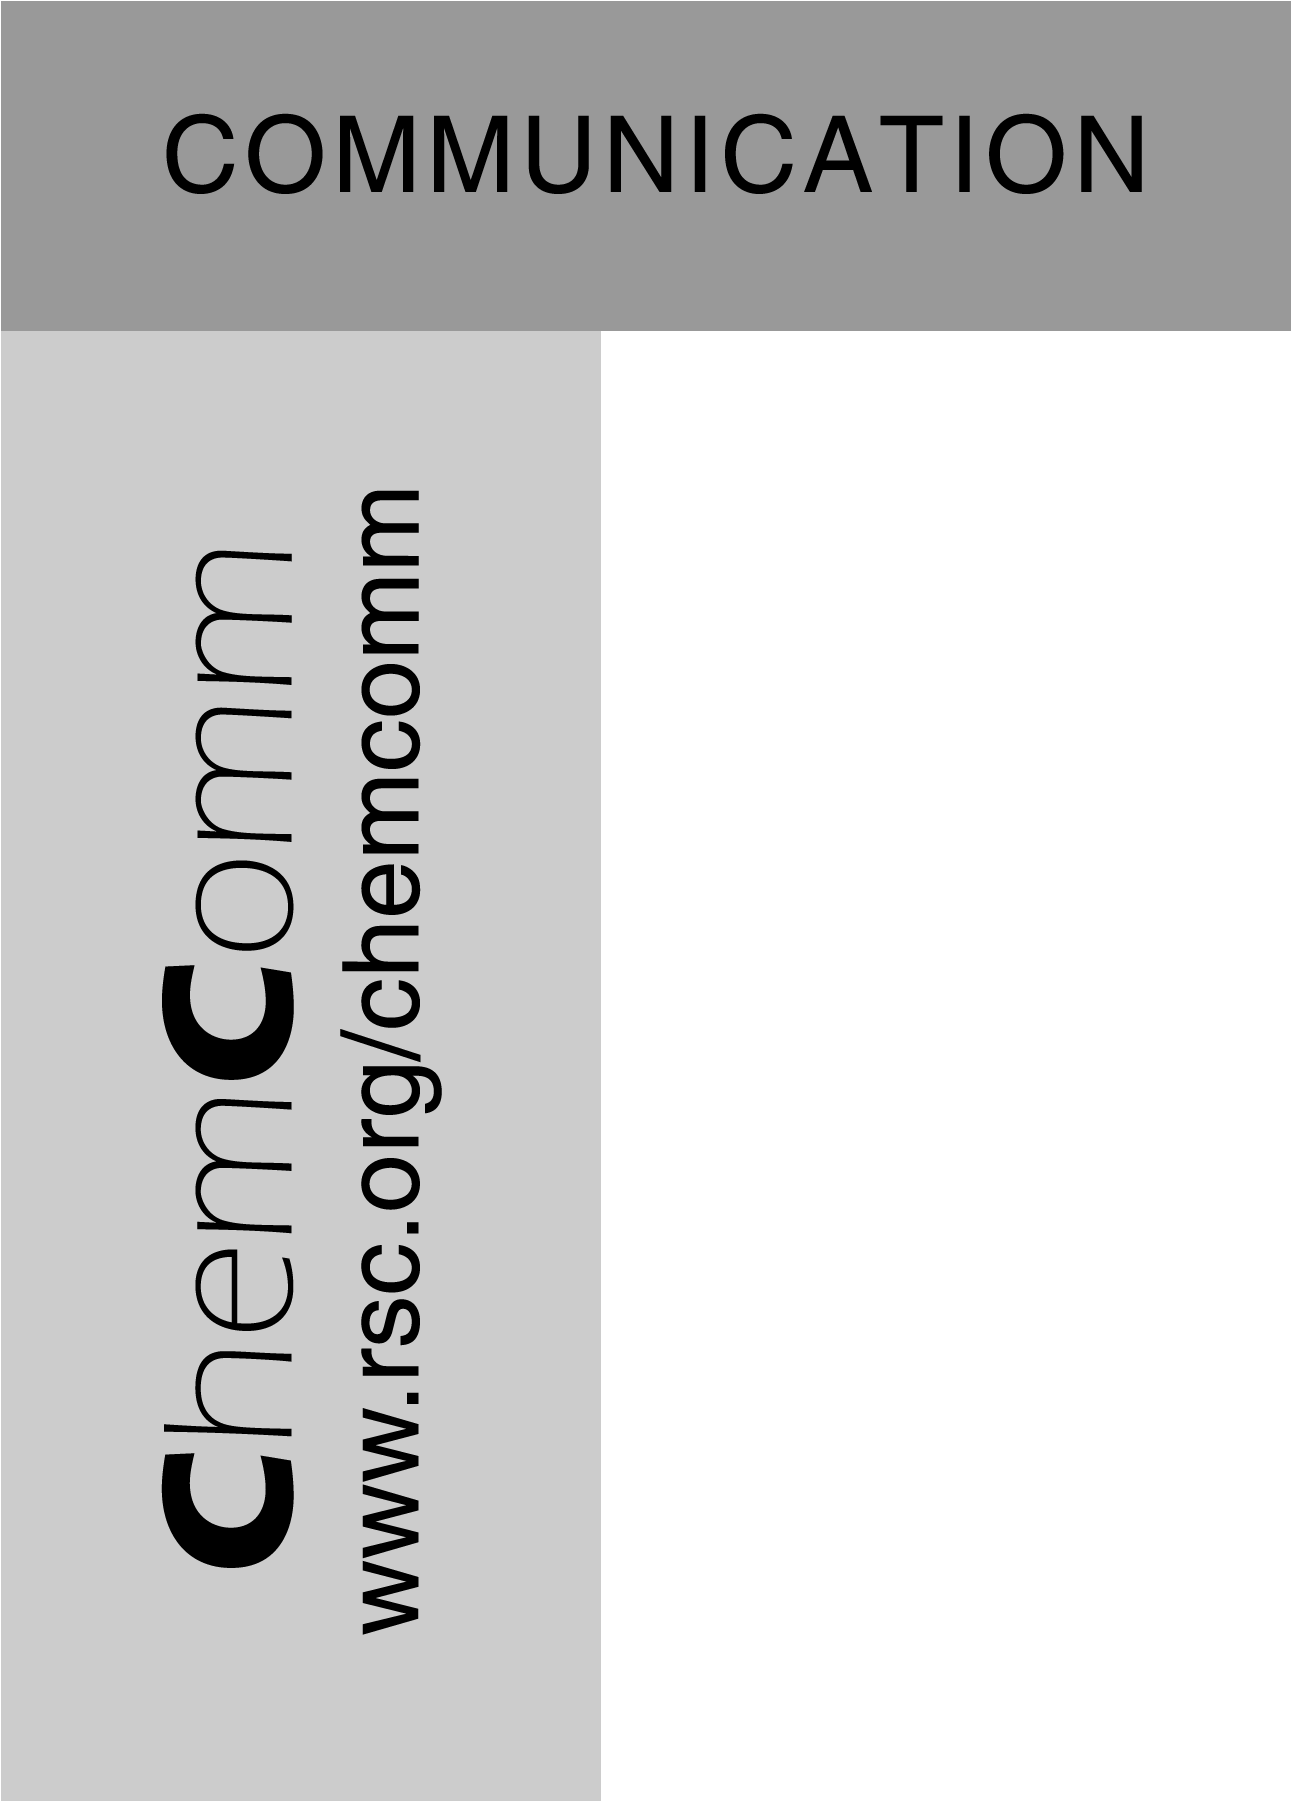
A well-defined magnesium-enolate initiator for the living and highly syndioselective polymerisation of methylmethacrylate

Andrew P. Dove, Vernon C. Gibson*, Edward L. Marshall, John A. Segal, Andrew J.P. White and David J. Williams

Synthesis of (BDI)MgIPr

(BDI)H (6.880g, 1.64 x 10-2mol) was dissolved in 50cm3 toluene and lithiated via the addition of 6.7cm3  nBuLi (2.5M in hexanes, 1.68 x 10-2mol). In a separate vessel 8.4cm3 iPrMgCl (2.0M in Et2O, 1.68 x 10-2mol) was diluted with 10cm3 toluene and concentrated under reduced pressure to a white viscous liquid. The white sticky oil thus obtained was suspended in 20cm3 toluene and this mixture was then added dropwise to the solution of "(BDI)Li" to afford a pale yellow, cloudy suspension.

The reaction was stirred overnight (18hours) at room temperature and then filtered. Volatiles were removed in vacuo and the resultant cream coloured solid was washed with 5cm3 cold (—78˚C) n-pentane to afford 7.732g of a slightly off-white powder (1.59 x 10‑2mol, 97.0%).

1H NMR (C6D6):  7.10 (m, 6H, *m-H*, *p-H*), 4.92 (s, 1H, *H*C{C(CH3)NAr}2), 3.13 (sept, 4H, 3JHH = 6.9Hz, C*H*Me2), 1.67 (s, 6H, HC{C(C*H*3)NAr}2), 1.26 (d, 12H, 3JHH = 6.9Hz, CH(C*H*3)2), 1.14 (d, 12H, 3JHH = 6.9Hz, CH(C*H*3)2), 0.86 (d, 6H, 3JHH = 6.6Hz, MgCH(C*H*3)2), 0.13 (sept, 1H, 3JHH = 6.3Hz, MgC*H*(CH3)2). 13C NMR (C6D6):  168.84 (HC{*C*(CH3)NAr}2), 143.63 (Cipso), 141.41 (Cortho), 125.71 (Cpara), 123.80 (Cmeta), 94.89 (H*C*{C(CH3)NAr}2), 28.39 (Ar*C*H(CH3)2), 24.10 (HC{C(*C*H3)NAr}2), 24.02 (MgCH(*C*H3)2), 23.15 (ArCH(*C*H3)2), 9.22 (Mg*C*H(CH3)2). Elemental analysis for C32H48N2Mg: C 79.24, H 9.97, N 5.78%. Found C 79.31, H 9.94, N 5.68%.

Synthesis of complex **1**

0.903g (BDI)MgiPr (1.86 x 10-3mol) was suspended in 20cm3 THF at -78˚C. To this stirring suspension 0.32cm3 2',4',6-trimethylacetophenone (1.92 x 10-3mol) was added dropwise over 5minutes. The reaction was then allowed to warm to ambient temperature and was stirred overnight. Removal of volatiles gave a sticky cream-coloured solid which was washed with 5cm3 pentane to yield 0.901g of a fine white powder (1.33 x 10-3mol; 71.7%).

Synthesis of complex **2**

To a cold (-78˚C) solution of (BDI)MgiPr (2.1895g; 4.51 x 10-3mol; in 20cm3 toluene) was added 0.75cm3 2',4',6-trimethylacetophenone (4.51 x 10-3mol) via syringe over 2minutes to afford a bright red solution which turns orange then yellow on warming to room temperature. After stirring for 22hours the reaction was reduced *in vacuo* to a give a pale yellow solid which was recrystallised from 15cm3 warm (60˚C) heptane. Yield: 2.3934g; 3.97 x 10-3mol; 87.9%.

Polymerisation details

Polymerisations were typically performed in a glove box freezer set to -30˚C containing a magnetic stirrer. Monomers and solvents (toluene and chloroform-d1) were stored in the freezer for several hours before use.

*Typical polymerisation procedure*

0.0084g complex **2** (1.39 x 10-5mol) was weighed out into a glass vial and dissolved in 5cm3 toluene to afford a pale yellow solution. The solution was placed in the freezer and stirred for at least 30minutes to allow the reaction temperature to equilibrate. Methyl methacrylate (0.4183g, 4.18 x 10-3mol, 300equivalents) was weighed out into a second vial and allowed to stand in the freezer for a similar amount of time, before being added to the initiator solution. The polymerisation was stirred for 10minutes, then removed from the glove box and terminated via the addition of 25l MeOH.

GPC analysis was performed on a small aliquot, which was removed and dried in vacuo. The remainder of the solution was added to a large excess (ca. 150cm3) MeOH, and the precipitate was collected and dried. 1H NMR analysis (CDCl3) confirmed the sample to be >90% enriched in the rr triad.

*Investigation into the relationship between conversion and molecular weight*

Using a similar method to that described above, 0.0080g **2** (1.33 x 10-5mol) was dissolved in 6cm3 CDCl3. To this solution at -30˚C was added neat methylmethacrylate (0.5317g, 5.31 x 10-3mol, 400equivalents). The reaction was stirred and at set time periods 0.35cm3 aliquots were removed and immediately terminated by addition to 20l MeOH.

Monomer conversion was calculated by diluting the samples with a further 0.35cm3 CDCl3 and integrating the 1H NMR resonances of the OCH3 signals of the monomer (3.71) versus the polymer (3.56). Volatiles were then removed in vacuo and the residue was dissolved in non-deuterated CHCl3 and analysed by gel permeation chromatography.
